# Supplementary material for: Specific ion effects on the soil shear strength and clay surface properties of collapsing wall in Benggang
Source: PeerJ. 2024 Sep 3;12:e17796. doi: 10.7717/peerj.17796 (PMC11378760; doi:10.7717/peerj.17796)
Supplement: Supplemental Information 1 [file peerj-12-17796-s001.xlsx]

## Sheet: Table 1
	Red soil	Sandy soil	Detritus soil
pH	5.01	5.19	5.22
	5.16	5.05	5.29
	5.02	5.15	5.25
SOM (g kg-1)	3.27	1.13	1.22
	3.27	1.08	1.2
	3.29	1.1	1.22
CEC (cmol kg-1)	10.9822	7.05667	6.85
	10.8141	7.44595	6.945
	11.0319	7.24463	6.89
BD (g cm-3)	1.43	1.33	1.33
	1.44	1.3	1.31
	1.43	1.32	1.32
Sand (%)	20.4021	40.7201	38.2568
	19.9586	40.8269	39.052
	20.8536	40.3143	37.7341
Silt (%)	51.829	52.0114	54.2071
	53.2964	51.869	53.5785
	52.8852	52.3104	54.7449
Clay (%)	27.769	7.2685	7.53613
	26.745	7.30409	7.3695
	26.2612	7.37528	7.52098
PL (%)	39.57	29.55	29.01
	38.75	29.38	29.17
	39.64	29.71	29.31
LL (%)	84.12	47.85	40.26
	84.35	47.98	39.97
	84.34	47.86	40.11
PI (%)	44.55	18.3	11.25
	45.6	18.6	10.8
	44.7	18.15	10.8

## Sheet: Table 2
Soil layer	Kaolinite	HIV	Illite	Gibbsite	Total	Kaolinite(%)	HIV(%)	Illite(%)	Gibbsite(%)
Red soil	15.6	1.2	0.5	0.8	18.1	86.1878	6.62983	2.76243	4.41989
Sandy soil	15.3	1.5	0.9	1	18.7	81.8182	8.02139	4.81283	5.34759
Detritus soil	16.3	1.6	1	0.9	19.8	82.3232	8.08081	5.05051	4.54545

## Sheet: Table3
Soil layer	cNa0	cCa0	NNa	NCa	1I	m	1/κ
	mmol L-1		10-2mol kg-1		103		nm
Red soil	8.94191	2.25381	1.52007	11.6024	8.97858	2.71476	3.30145
	8.82092	2.10677	1.70246	11.824	8.624	2.74307	3.40056
	8.90651	2.4224	1.57344	11.3482	9.29805	2.67473	3.26639
Sandy soil	9.1529	3.50155	1.03061	9.70391	11.5775	2.49732	3.16723
	9.14952	3.18352	1.51012	10.1849	10.934	2.5472	3.26535
	8.8788	3.08788	1.38357	10.3373	10.6	2.54745	3.14718
Detritus soil	8.85994	2.35271	1.59934	11.4415	9.13539	2.68733	3.40474
	8.99703	2.62156	1.36949	11.0283	9.74163	2.6385	3.35053
	9.28085	3.37971	0.893106	9.86283	11.3999	2.52124	3.3451

## Sheet: Table4
Soil layer	φ0	S	SCN	σ0	E0
	mV	103 m2 kg-1	cmol kg-1	C m-2	108 V m-1
Red soil	-90.1257	33.6558	25.3631	0.727117	10.2665
	-84.8183	33.5724	27.4531	0.7196	7.047
	-94.2747	33.1142	25.3717	0.736369	10.3972
Sandy soil	-86.1262	22.201	24.4132	1.2193	12.0102
	-83.811	26.4684	24.221	0.816676	15.7142
	-84.953	16.079	24.4676	1.32041	19.8436
Detritus soil	-83.8542	20.5685	22.6776	1.06379	15.0202
	-87.4283	20.354	22.7809	1.07989	15.2476
	-86.5184	22.6634	23.3061	0.992215	14.0096

## Sheet: Table 5
Soil layer	Saturated cation	0.0002 mol L-1	0.0005 mol L-1	0.001 mol L-1	0.005 mol L-1		0.01 mol L-1
		ζ (mV)	ζ (mV)	ζ (mV)		ζ (mV)	ζ (mV)
Red soil	Na+	-43.43	-39.4333	-38.7833		-36.3733	-35.4033
		-44.4567	-43.2333	-37.5433		-35.6733	-36.4533
		-40.76	-41.7733	-38.5633		-38.31	-36.3
	Li+	-41.28	-41.1667	-36.3933		-35.4433	-36.9433
		-41.5967	-41.9467	-35.0667		-36.1167	-36.1833
		-40.71	-42.3567	-35.2667		-36.2867	-36.1767
	K+	-46.1667	-43.42	-44.97		-37.0567	-32.6433
		-45.48	-44.5433	-42.8233		-38.28	-31.0767
		-45.4967	-40.3	-42.4333		-37.53	-32.3333
	NH4+	-47.6767	-46.0967	-41.81		-38.9567	-37.7367
		-48.9	-46.67	-42.2633		-36.84	-36.2967
		-47.1667	-45.5733	-42.27		-37.66	-36.1967
	Cs+	-49.42	-48.1767	-44.2833		-42.7233	-37.9633
		-51.6967	-48.9633	-46.63		-42.3133	-37.9033
		-53.34	-48.3467	-47.2633		-41.2467	-41.0733
Sandy soil	Na+	-48.98	-49.11	-46.2033		-43.9367	-44.39
		-46.3333	-47.88	-45.4067		-45.3933	-41.7733
		-46.7733	-45.49	-46.87		-41.3033	-45.37
	Li+	-53.87	-52.4967	-52.6033		-47.2133	-46.1133
		-53.9467	-53.3467	-51.54		-47.5733	-45.9167
		-54.74	-51.41	-51.3167		-48.51	-45.0467
	K+	-54.8233	-53.8567	-54.6333		-52.44	-49.3133
		-59.4033	-55.7967	-53.9933		-52.0267	-49.4633
		-56.5367	-54.28	-52.8433		-53.5533	-49.3233
	NH4+	-54.77	-48.51	-49.4067		-51.7333	-43.9967
		-51.88	-49.87	-48.42		-47.65	-44.39
		-55.4433	-51.01	-51.61		-49.2567	-45.2667
	Cs+	-53.6733	-48.88	-46.37		-44.5933	-42.3
		-49.2867	-50.3833	-46.25		-43.67	-43.18
		-53.2133	-51.9767	-44.9267		-42.1367	-42.0767
Detritus soil	Na+	-51.11	-52.4233	-50.15		-48.53	-47.8367
		-51.6033	-51.24	-49.59		-49.8033	-45.4367
		-50.5767	-50.4667	-48.77		-49.71	-48.1433
	Li+	-48.81	-52.0167	-54.8433		-47.93	-43.6967
		-50.87	-53.9333	-50.83		-49.6167	-44.8633
		-48.1667	-49.7267	-53.4467		-45.8733	-45.61
	K+	-54.77	-52.3333	-51.9567		-44.3167	-44.6633
		-53.92	-50.4867	-51.5633		-46.2333	-45.25
		-55.3267	-47.9567	-51.61		-44.03	-44.71
	NH4+	-52.9333	-50.2067	-51.1033		-44.0333	-45.3233
		-55.5167	-50.23	-51.9567		-45.3433	-42.4133
		-53.9033	-51.5933	-49.22		-44.9433	-43.0233
	Cs+	-54.4733	-51.2533	-50.92		-46.1333	-45.1733
		-55.11	-51.3033	-50.0967		-47.7833	-47.39
		-54.8233	-51.6967	-50.1133		-47.6967	-46.4867

## Sheet: Table 6
Soil layer	Saturated cation	0.0002 mol L-1	0.0005 mol L-1	0.001 mol L-1	0.005 mol L-1		0.01 mol L-1
		xs (nm)	xs (nm)	xs (nm)		xs (nm)	xs (nm)
Red soil	Na+	19.8999	13.7632	9.86611		4.64339	3.34721
		19.4425	12.6206	10.1488		4.71562	3.25874
		21.1373	13.0506	9.91886		4.4388	3.27842
	Li+	20.8901	13.2302	10.4353		4.75056	3.22999
		20.7334	12.9927	10.7608		4.6684	3.28281
		21.1534	12.8701	10.7068		4.64669	3.27989
	K+	18.7249	12.5716	8.57436		4.56729	3.57812
		19.002	12.2509	8.98663		4.4283	3.70911
		19.0001	13.4868	9.07248		4.51334	3.60181
	NH4+	18.0965	11.8264	9.18625		4.35068	3.14718
		17.6305	11.6881	9.10257		4.58248	3.26643
		18.3007	11.9668	9.09184		4.48609	3.26556
	Cs+	17.4388	11.3135	8.7049		4.00557	3.14666
		16.5939	11.1154	8.25539		4.03571	3.14379
		16.0237	11.267	8.14434		4.13739	2.92257
Sandy soil	Na+	17.6262	11.1064	8.36149		3.91665	2.73383
		18.673	11.4042	8.50494		3.7882	2.89668
		18.4928	12.0187	8.23477		4.15286	2.67026
	Li+	15.8596	10.3152	7.26793		3.63387	2.62248
		15.8305	10.1272	7.43335		3.60304	2.63152
		15.5815	10.572	7.48328		3.54388	2.69782
	K+	15.5513	10.0284	6.96813		3.2507	2.4521
		14.1123	9.6142	7.0542		3.27001	2.43453
		14.9929	9.9362	7.23647		3.17111	2.44862
	NH4+	15.5637	11.2485	7.79074		3.29668	2.75404
		16.5555	10.9232	7.96259		3.60554	2.73215
		15.3352	10.6465	7.41985		3.46944	2.66774
	Cs+	14.9265	11.1528	7.32097		3.85087	2.85647
		16.5	10.7971	7.34423		3.93238	2.80119
		15.0853	10.4318	7.59221		4.07119	2.87258
Detritus soil	Na+	16.8175	10.3256	7.65479		3.52253	2.51641
		16.6483	10.598	7.75549		3.43286	2.66175
		17.0307	10.7884	7.90802		3.45254	2.51975
	Li+	16.9157	10.4256	6.93198		3.58036	2.70047
		17.9365	10.0102	7.55573		3.45214	2.65742
	K+	15.5644	10.3581	7.37384		3.88035	2.71422
		15.8491	10.7774	7.43856		3.71984	2.67964
		15.3849	11.3891	7.43374		3.90982	2.71537
	NH4+	16.1865	10.8421	7.51196		3.90597	2.67479
		15.3184	10.8366	7.37333		3.79253	2.85494
		15.8516	10.5208	7.82047		3.8238	2.81308
	Cs+	15.6607	7.53777	7.53777		3.724	2.68034
		15.448	7.6712	7.6712		3.5893	2.54978
		15.542	7.66816	7.66816		3.59425	2.59982

## Sheet: Figure 5
	Red soil Confining pressure = 50 kPa							Red soil Confining pressure = 100 kPa							Red soil Confining pressure = 200 kPa							Red soil Confining pressure = 300 kPa
Red soil		Na+	Li+	K+	NH4+	Cs+			Na+	Li+	K+	NH4+	Cs+			Na+	Li+	K+	NH4+	Cs+			Na+	Li+	K+	NH4+	Cs+
	Axial Strain (%)	Principal stress difference (kPa)						Axial Strain (%)	Principal stress difference (kPa)						Axial Strain (%)	Principal stress difference (kPa)						Axial Strain (%)	Principal stress difference (kPa)
	0	0	0	0	0	0		0	0	0	0	0	0		0	0	0	0	0	0		0	0	0	0	0	0
	1.004	270	185	223	230	193		1.001	268	72	205	175	46		0.999	218	165	153	121	41		1.02	275	104	105	94	13
	2.004	520	502	611	572	466		2.009	541	421	570	603	428		2.006	537	582	545	444	396		2.021	606	288	440	313	318
	3.011	532	589	635	693	604		3.016	614	650	744	801	724		3.014	664	820	801	799	755		3.029	739	692	830	735	760
	4.019	517	574	602	663	615		4.024	625	690	769	819	771		4.021	715	879	878	937	871		4.036	812	867	985	948	949
	5.026	505	554	561	625	615		5.024	623	699	766	810	767		5.021	747	912	918	995	917		4.991	865	944	1061	1043	1026
	6.034	497	542	502	589	599		6.031	624	703	758	794	757		6.029	776	938	950	1029	953		5.999	913	1006	1121	1108	1083
	7.041	482	524	432	562	578		7.039	625	706	752	780	742		7.036	806	962	977	1048	980		7.006	960	1060	1177	1157	1135
	7.997	464	482	405	536	556		7.994	616	703	739	734	713		7.993	827	981	1000	1056	1005		8.014	1002	1109	1221	1199	1179
	9.005	445	451	400	495	508		9.001	604	689	720	663	661		9	842	992	1013	1049	1019		9.014	1035	1145	1251	1234	1213
	10.005	425	422	397	446	451		10.009	580	661	701	624	633		10.008	851	1005	1021	1010	1014		10.021	1060	1159	1281	1258	1239
	11.013	414	407	391	417	408		11.016	545	628	682	603	604		11.015	858	1004	1023	945	1001		11.029	1079	1180	1303	1276	1262
	12.02	407	397	394	403	394		12.016	518	594	662	590	577		12.015	864	1002	1019	913	986		12.036	1095	1199	1317	1293	1275
	13.028	402	393	393	401	392		13.024	497	575	640	586	566		13.023	871	1000	1017	894	967		12.993	1108	1217	1329	1307	1288
	14.035	407	390	400	398	400		14.031	485	566	630	591	555		14.03	877	996	1014	884	942		14	1120	1234	1343	1317	1301
	14.99	406	398	402	402	409		15.003	477	571	618	596	556		15.008	885	992	1012	878	910		15.008	1129	1264	1347	1338	1323
	Sandy soil Confining pressure = 50 kPa							Sandy soil Confining pressure = 100 kPa							Sandy soil Confining pressure = 200 kPa							Sandy soil Confining pressure = 300 kPa
Sandy soil		Na+	Li+	K+	NH4+	Cs+			Na+	Li+	K+	NH4+	Cs+			Na+	Li+	K+	NH4+	Cs+			Na+	Li+	K+	NH4+	Cs+
	Axial Strain (%)	Principal stress difference (kPa)						Axial Strain (%)	Principal stress difference (kPa)						Axial Strain (%)	Principal stress difference (kPa)						Axial Strain (%)	Principal stress difference (kPa)
	0	0	0	0	0	0		0	0	0	0	0	0		0	0	0	0	0	0		0	0	0	0	0	0
	1	196	145	226	155	221		1.003	255	227	231	199	140		1.02	271	177	276	236	232		1.034	106	163	228	133	159
	2.008	326	288	339	275	308		2.01	398	339	376	303	312		2.028	419	330	371	293	342		1.99	322	324	316	174	314
	3.015	365	333	352	300	325		3.01	441	375	410	334	353		3.028	485	387	427	343	403		2.998	430	398	385	289	399
	4.023	377	346	354	313	331		4.018	463	395	429	360	382		3.99	530	428	461	383	445		4.005	508	453	444	360	462
	5.023	380	349	357	319	339		5.025	474	414	447	376	403		4.99	563	461	499	416	479		5.013	567	500	493	410	512
	6.03	392	355	367	330	344		6.033	490	436	464	398	421		5.998	598	493	538	453	515		6.02	620	546	541	459	562
	7.038	394	361	377	343	351		7.04	511	453	481	420	437		7.005	634	523	572	486	547		7.02	673	589	588	506	608
	7.993	400	367	381	350	355		7.996	526	459	491	438	454		8.013	666	554	599	518	558		8.028	720	628	633	536	651
	9	402	348	388	346	358		8.996	536	471	513	454	466		9.02	692	582	633	544	579		9.035	758	660	673	576	688
	10.008	400	345	383	346	359		10.004	539	477	525	463	472		10.02	706	599	654	563	595		9.99	799	686	700	607	716
	11.015	393	343	383	345	359		11.011	542	481	526	471	475		11.028	721	614	668	584	613		10.998	825	711	724	630	746
	12.015	387	343	380	348	359		12.019	542	487	532	480	482		12.035	738	635	683	603	634		12.005	853	739	753	656	773
	13.024	382	342	381	350	363		13.026	548	496	535	486	491		12.991	753	655	702	621	653		13.013	879	767	781	683	806
	14.031	382	341	382	352	366		14.034	549	505	540	497	500		13.999	769	673	720	641	675		14.013	907	794	809	708	834
	15.001	381	341	382	355	367		15.004	548	513	538	507	512		15.006	786	701	731	662	695		15.005	948	827	838	744	869
	Detritus soil Confining pressure = 50 kPa							Detritus soil Confining pressure = 100 kPa							Detritus soil Confining pressure = 200 kPa							Detritus soil Confining pressure = 300 kPa
Detritus soil		Na+	Li+	K+	NH4+	Cs+			Na+	Li+	K+	NH4+	Cs+			Na+	Li+	K+	NH4+	Cs+			Na+	Li+	K+	NH4+	Cs+
	Axial Strain (%)	Principal stress difference (kPa)						Axial Strain (%)	Principal stress difference (kPa)						Axial Strain (%)	Principal stress difference (kPa)						Axial Strain (%)	Principal stress difference (kPa)
	0	0	0	0	0	0		0	0	0	0	0	0		0	0	0	0	0	0		0	0	0	0	0	0
	1.035	325	82	356	345	312		1.005	302	272	479	480	437		1.036	308	378	536	543	526		1.005	265	369	329	507	491
	1.991	432	247	505	509	520		2.005	450	458	556	574	583		1.993	439	500	631	604	631		2.005	447	524	546	609	640
	2.999	433	401	505	506	533		3.013	469	506	576	597	609		3	493	549	678	644	688		3.013	512	602	630	674	717
	4.006	433	422	497	495	526		4.02	485	531	587	600	618		4	527	584	710	674	721		4.02	558	659	686	727	765
	5.006	430	428	485	484	518		5.028	492	547	600	605	625		5.008	553	608	739	704	750		5.028	593	706	729	774	804
	6.014	431	430	485	487	514		6.035	506	559	611	619	631		6.015	583	634	766	732	781		6.035	628	748	773	813	845
	7.021	432	428	484	487	510		6.99	523	568	619	626	639		7.023	611	659	785	752	804		6.99	663	784	811	845	882
	8.029	428	428	479	479	501		7.997	531	574	619	624	637		8.03	631	678	803	774	819		7.997	694	814	844	876	910
	9.036	432	422	474	472	489		8.997	536	576	621	628	640		9.038	649	697	817	786	836		8.997	726	844	875	899	933
	9.991	431	414	466	469	477		10.005	538	576	620	624	629		9.993	666	711	828	795	847		10.005	749	866	899	922	954
	10.999	428	408	455	456	469		11.013	543	574	615	622	626		11	679	722	834	804	853		11.013	776	884	919	942	971
	11.999	424	400	439	447	456		12.02	542	569	608	617	613		12	692	732	841	817	859		12.02	801	902	933	962	988
	13.006	425	389	430	442	449		13.028	548	568	606	617	599		13.008	707	747	852	830	868		13.028	822	921	953	984	1007
	14.014	426	381	426	439	443		14.035	556	567	608	620	588		14.015	726	760	858	845	879		14.035	847	943	974	1003	1028
	15	428	373	424	440	439		15	562	566	608	621	579		15.009	742	762	859	847	882		14.991	867	956	990	1008	1037

## Sheet: Figure 6
	Na+	Li+	K+	NH4+	Cs+	Na+	Li+	K+	NH4+	Cs+
Soil layer	Cohesion (kPa)					Internal friction angle (°)
Red soil	110.24	116.76	139.77	164.84	130.96	33.01	34.64	33.81	31.38	34.63
	109.16	114.23	131.34	155.66	132.74	32.57	35.87	34.33	33.68	34.13
	109.58	114.62	132.57	157.01	131.23	32.65	34.82	34.25	31.71	34.55
Sandy soil	77.86	78.34	81.58	86.26	79.5	34.04	31.19	31.77	28.23	30.12
	77.16	79.68	82.3	86.84	76.76	33.89	30.68	31.66	28.16	31.17
	77.26	78.54	82.21	86.35	79.08	34.01	31.12	31.75	28.18	31.01
Detritus soil	97.92	94.8	107.51	107.65	112.32	30.16	31.38	32.43	31.79	32.62
	97.76	91.57	106.49	111.04	111.61	30.73	33.02	32.73	31.88	32.69
	97.9	94.33	106.64	110.55	112.21	30.25	31.64	32.5	31.81	32.64
